# Supplementary material
Source: ML conference proceedings conference paper supplement (https://openreview.net/forum?id=tQP094M0j8G)
Supplement: supplementary_material [file attachment]

Concrete Representation

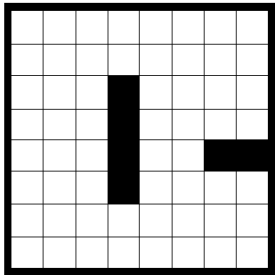

Abstraction when  
Passenger location=P

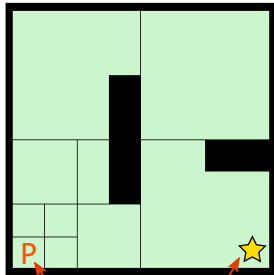

Passenger  
Location

Destination  
Location

Abstraction when  
Passenger location=taxi

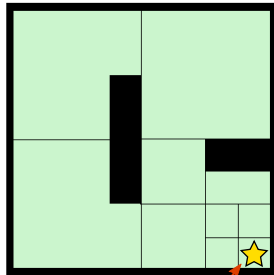

Destination  
Location
