# Supplementary material
Source: ML conference proceedings conference paper supplement (https://openreview.net/forum?id=tQP094M0j8G)

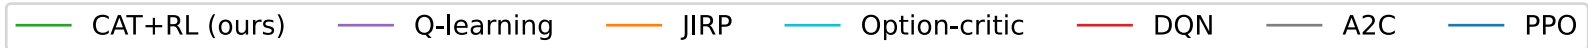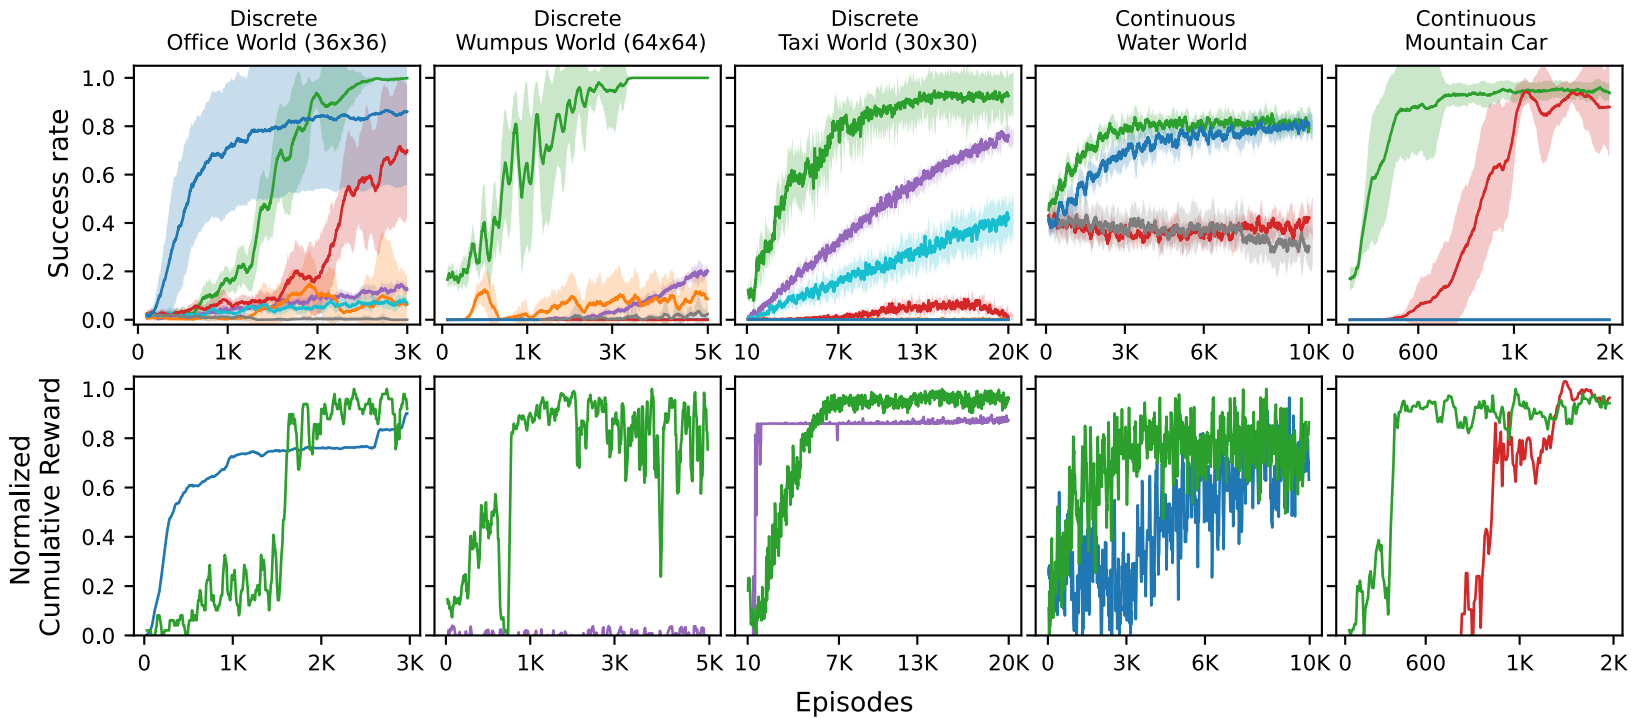

Supplement: supplementary_material [file attachment]

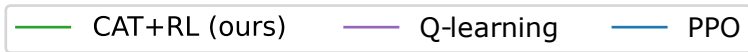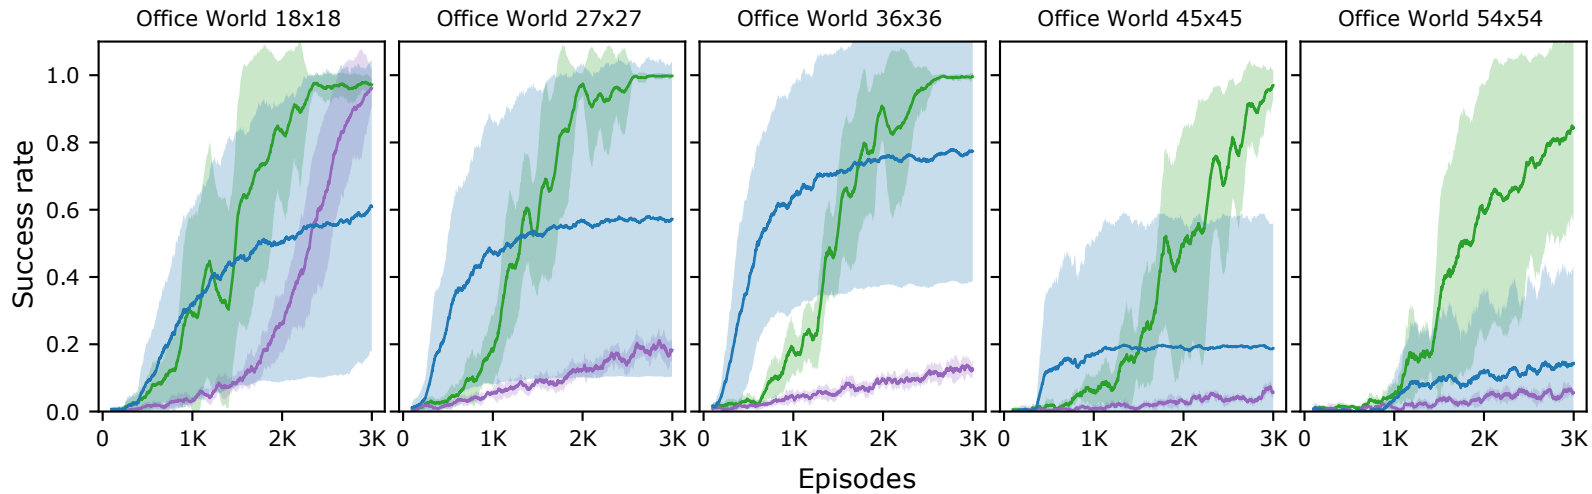

Supplement: supplementary_material [file attachment]

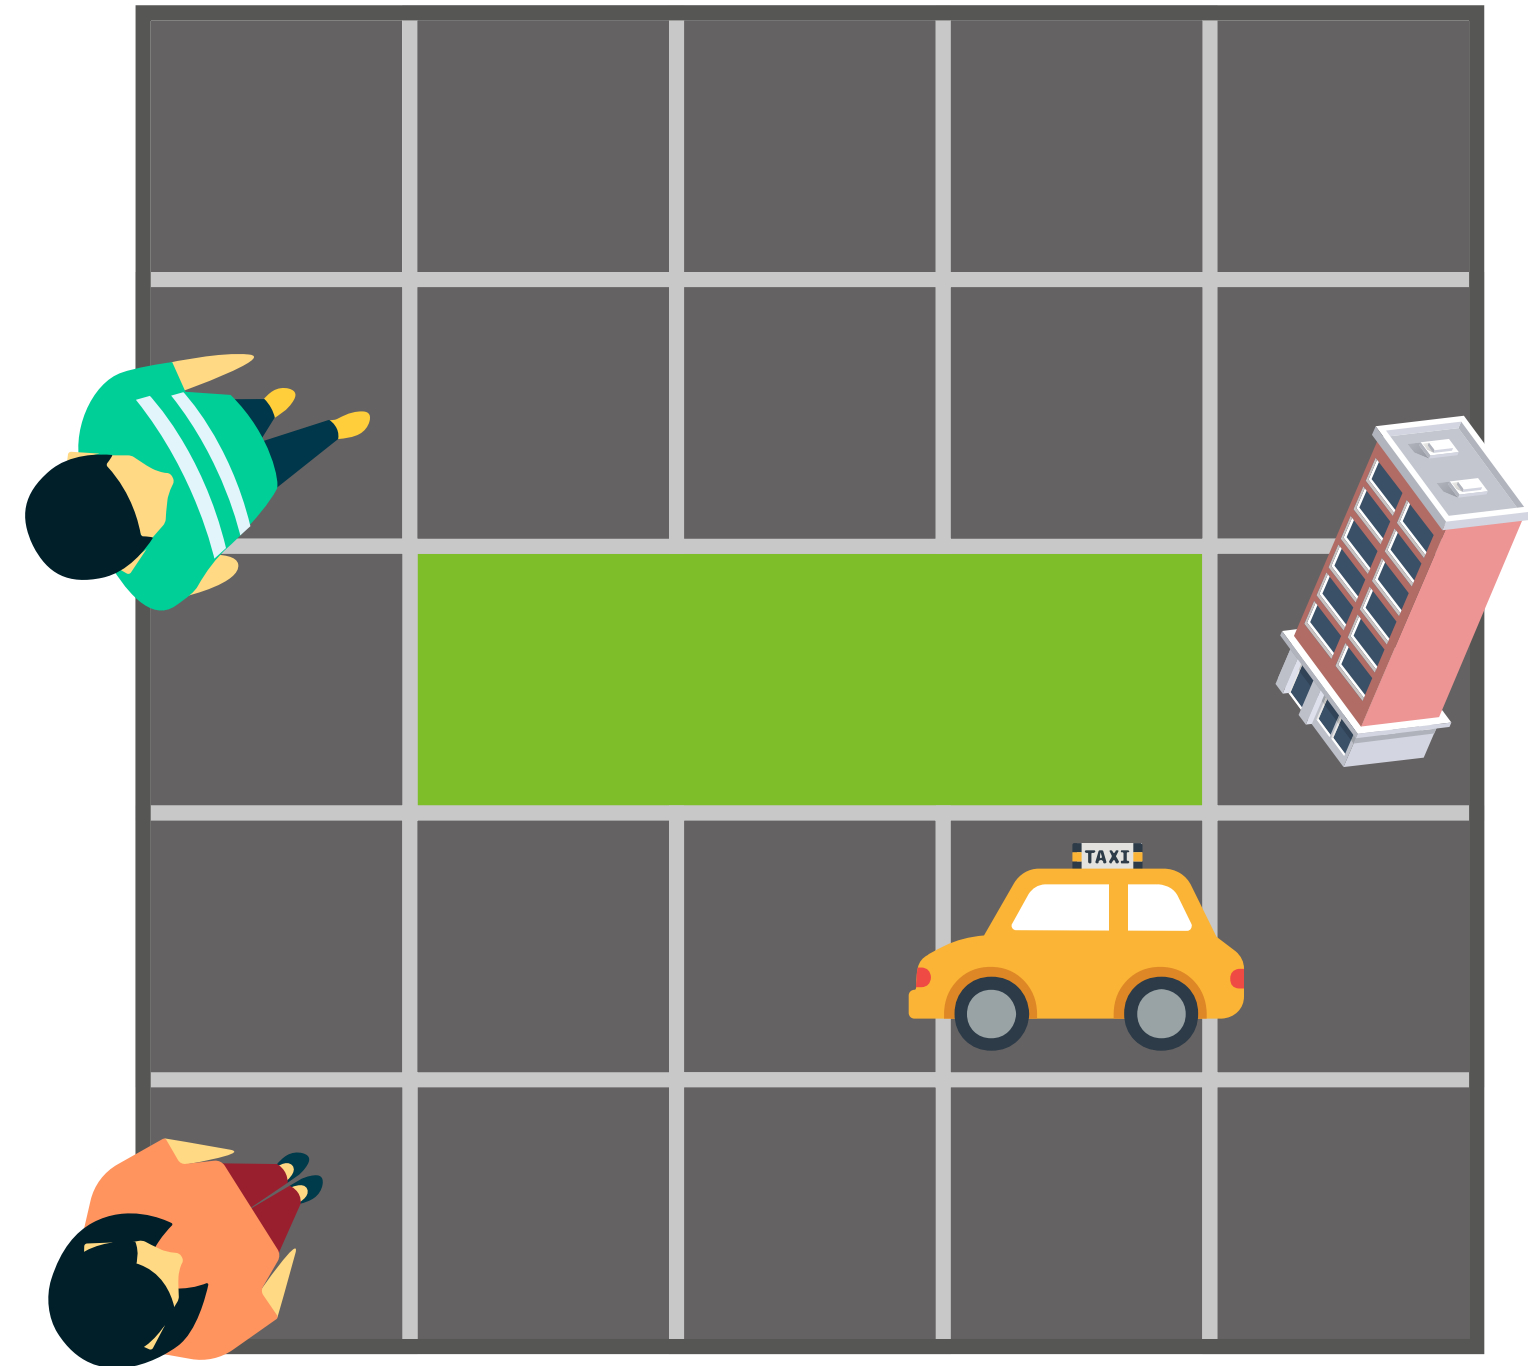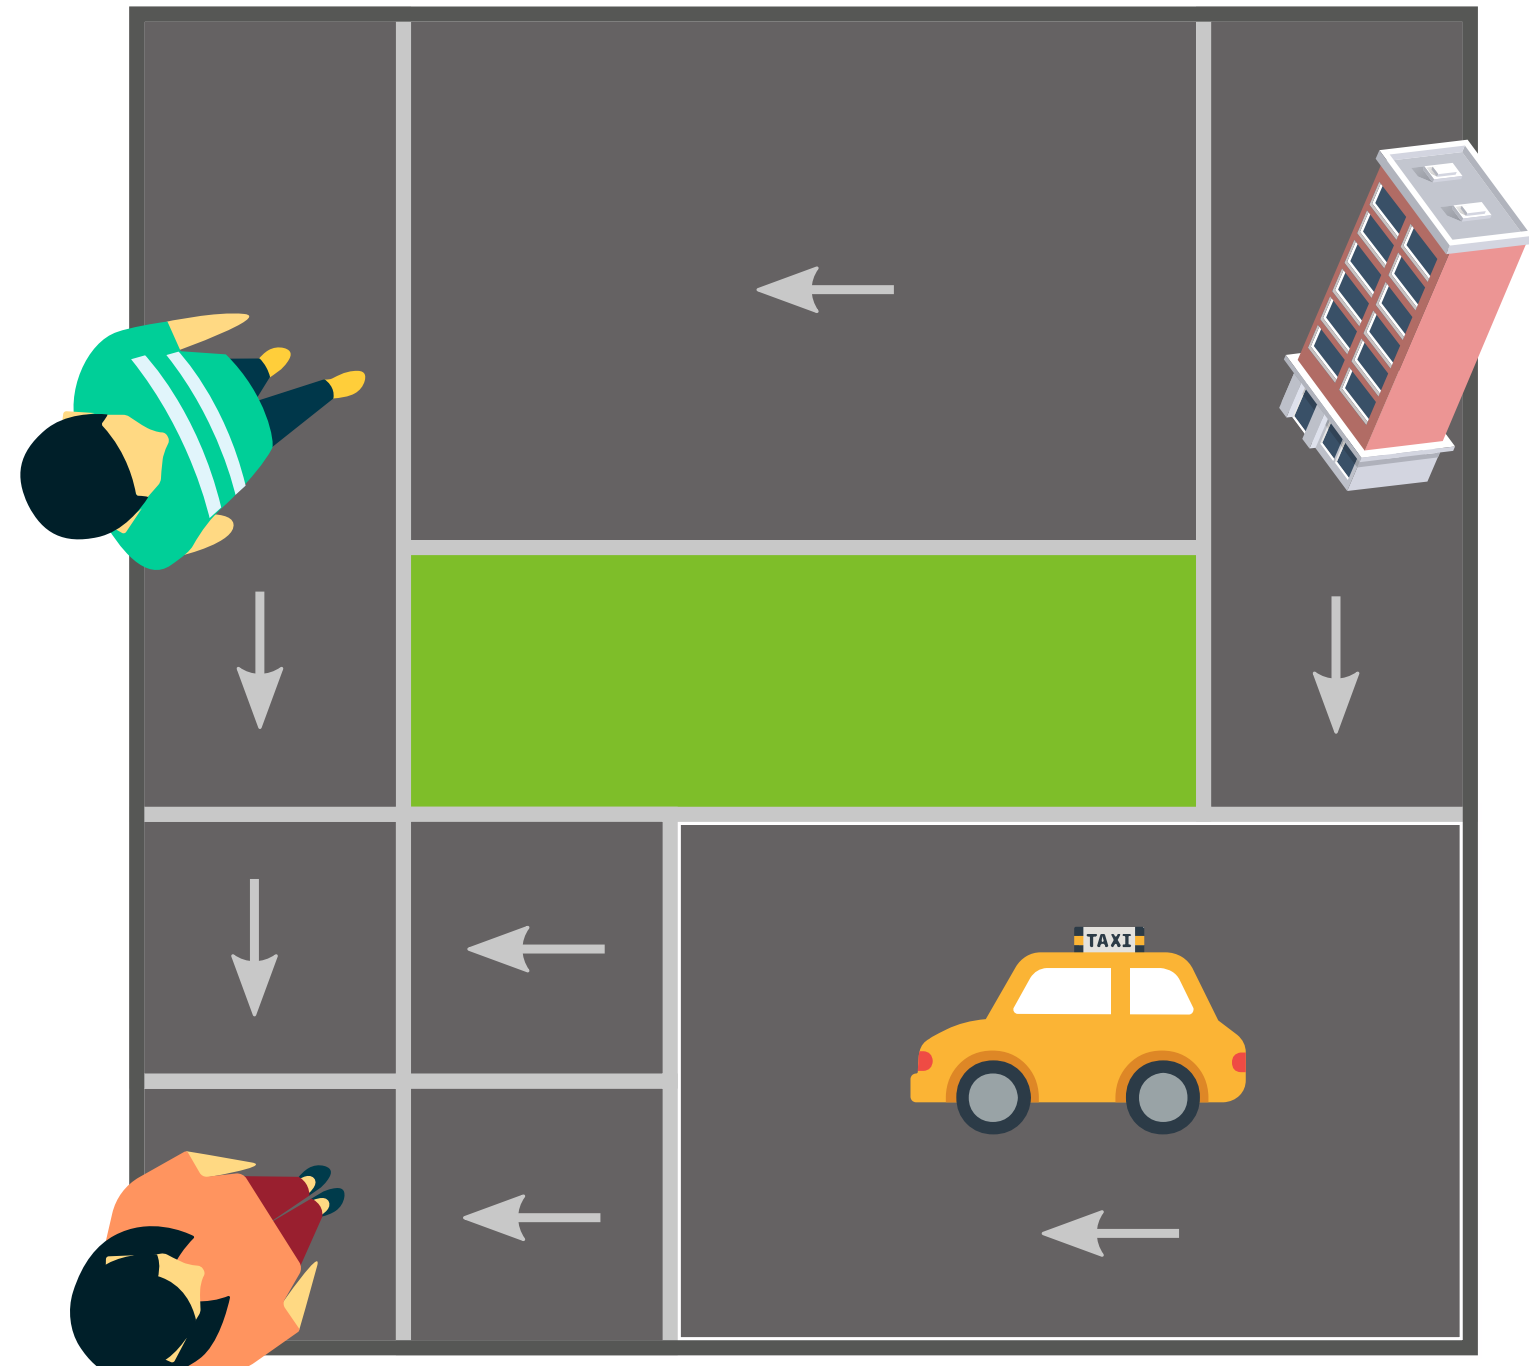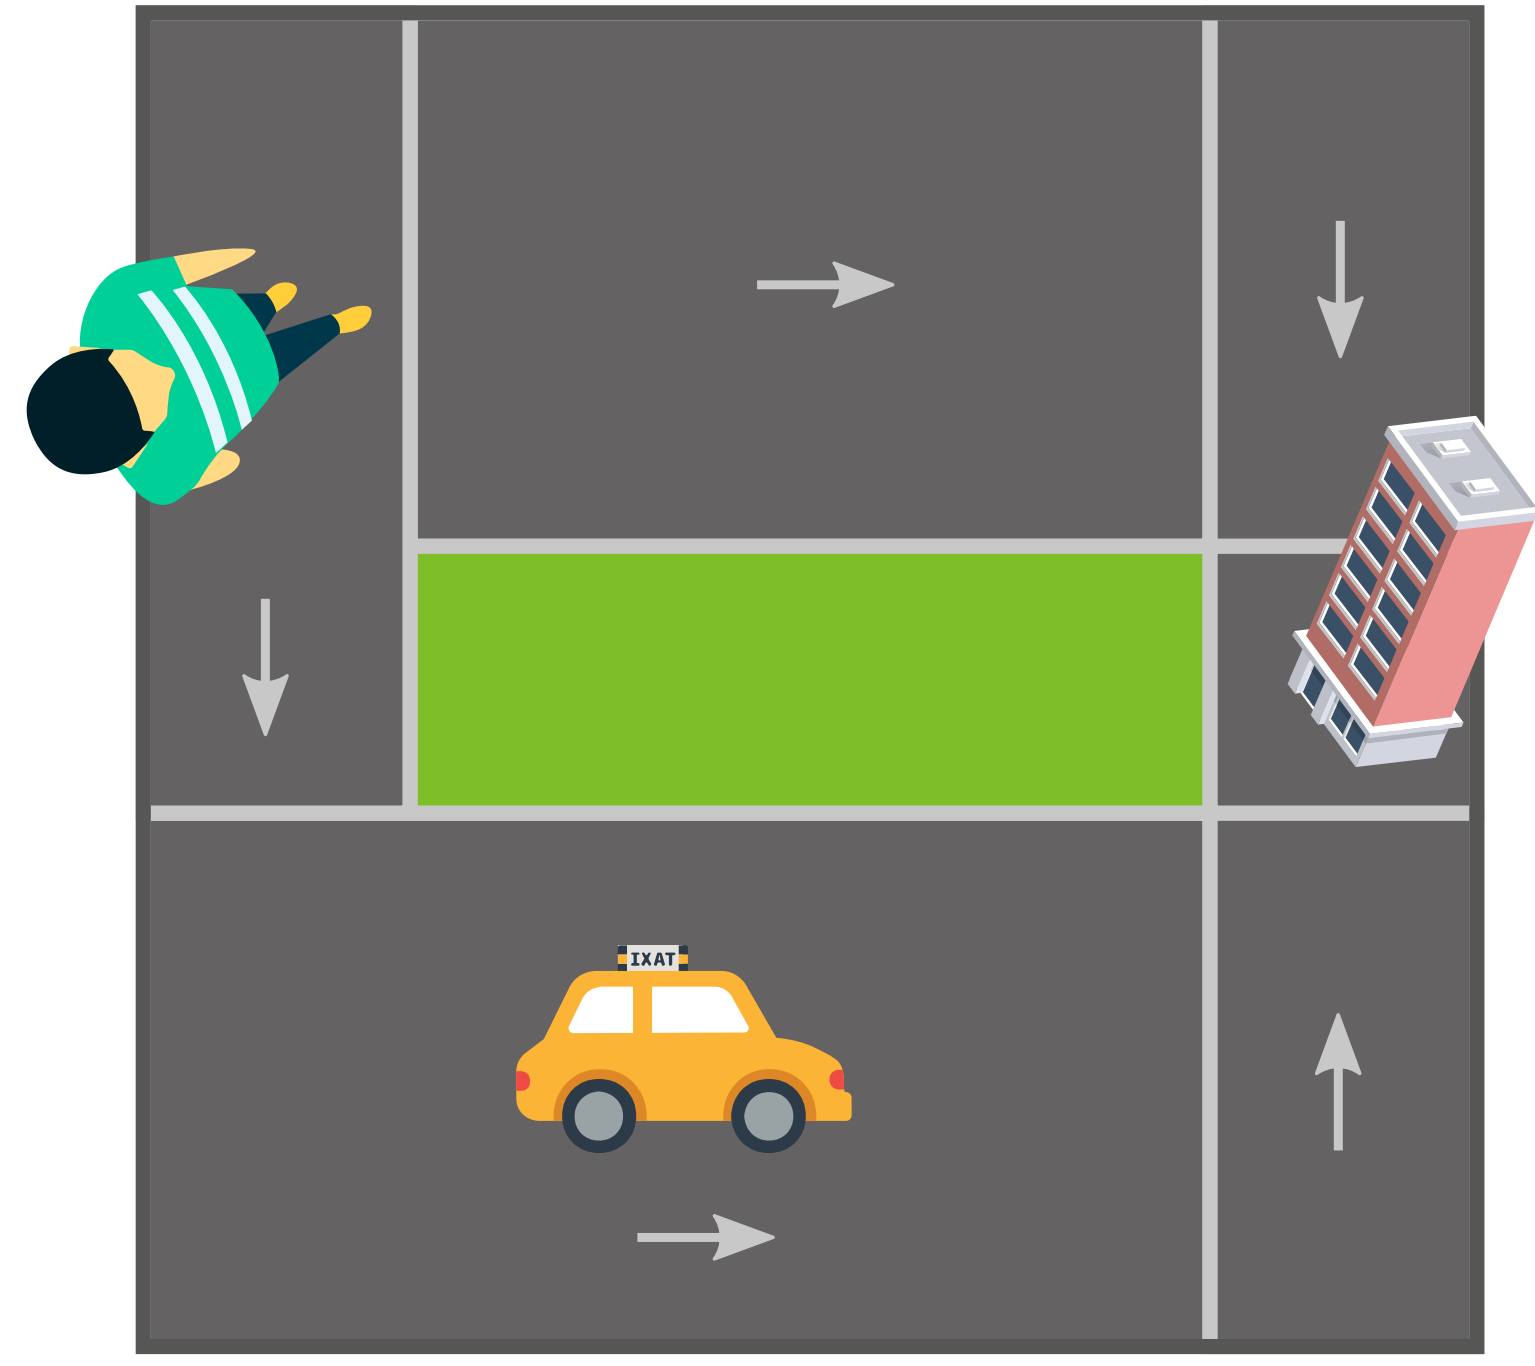

Supplement: supplementary_material [file attachment]

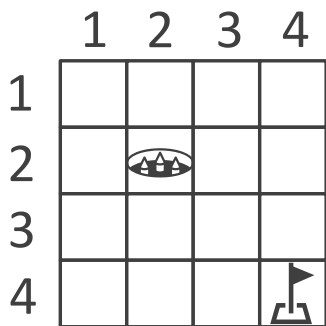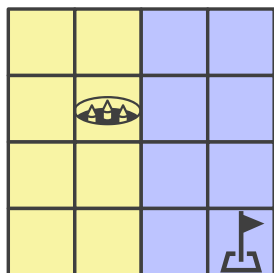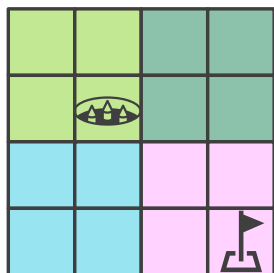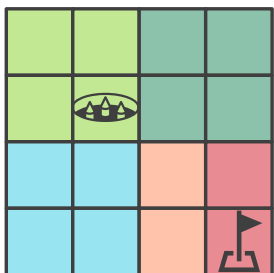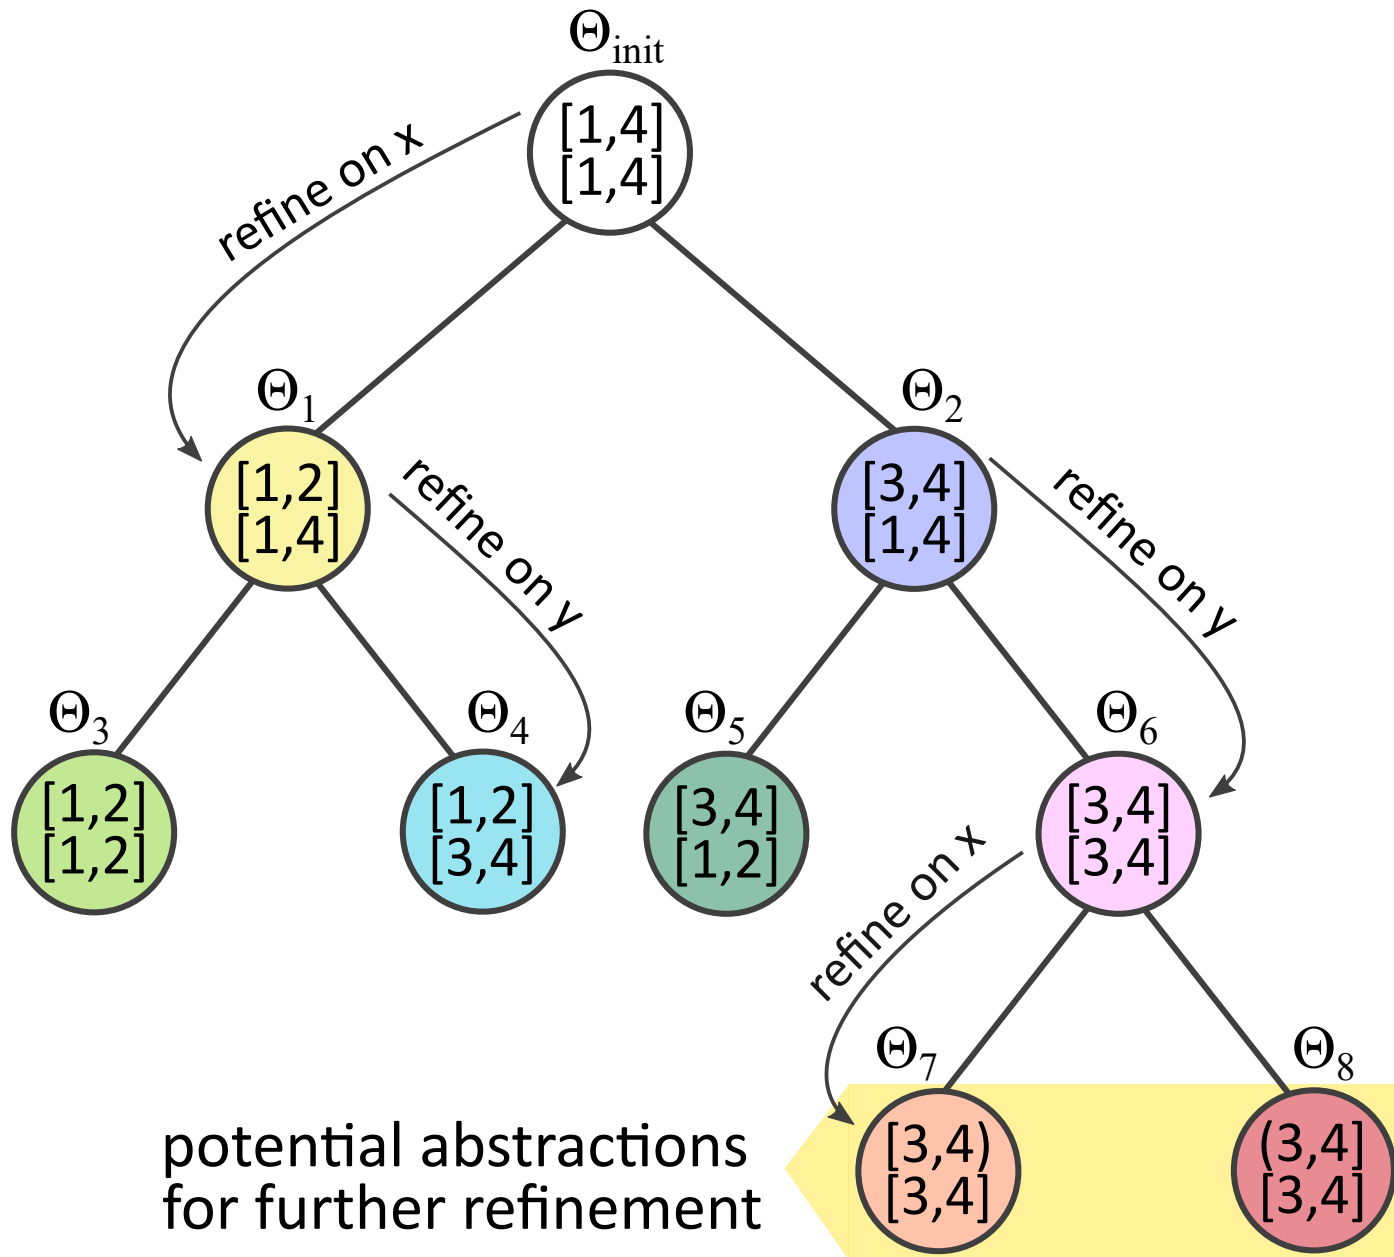

Supplement: supplementary_material [file attachment]

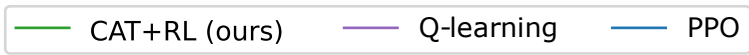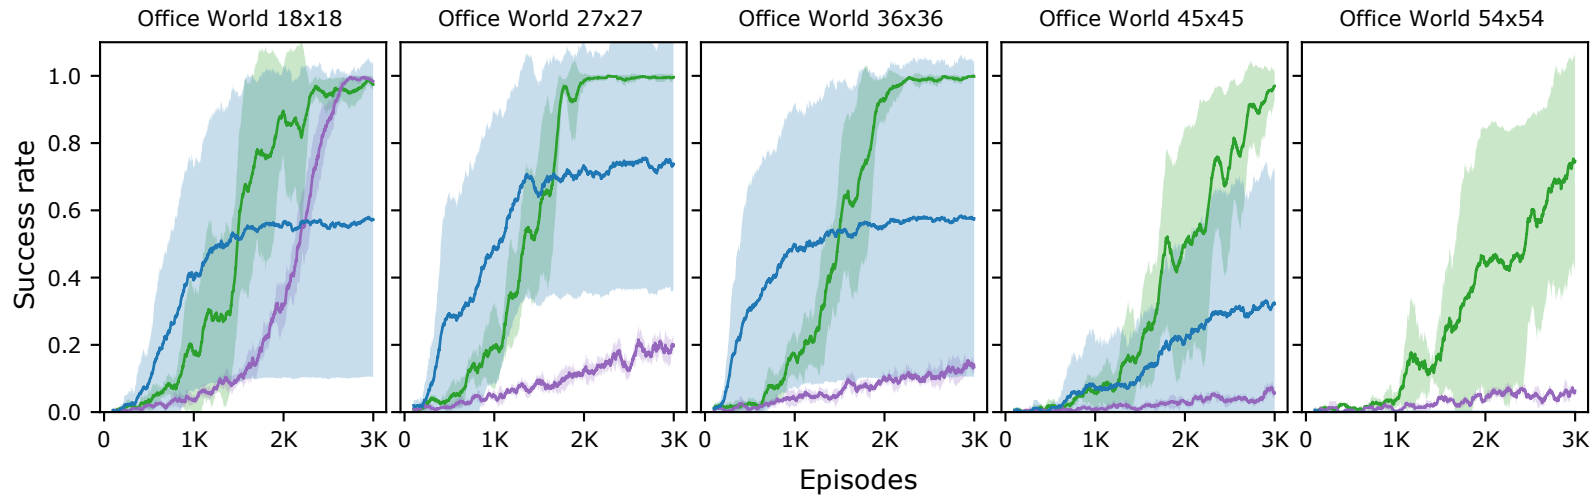

Supplement: supplementary_material [file attachment]

Office World 27x27

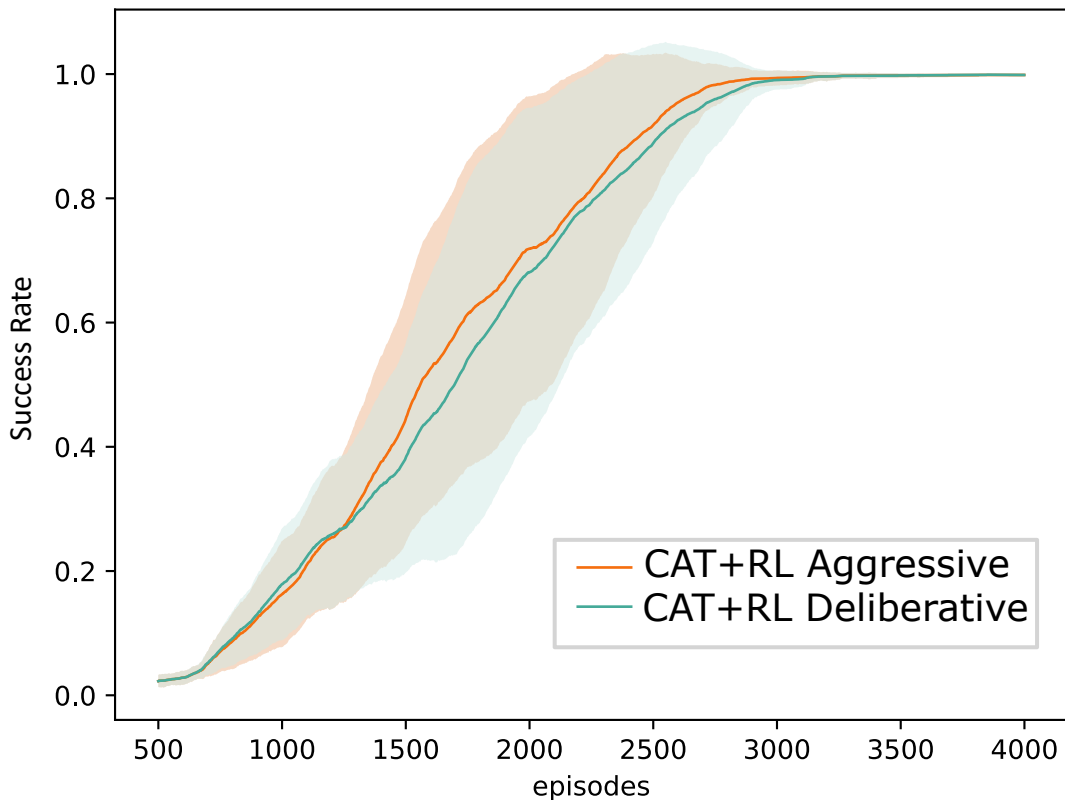

Supplement: supplementary_material [file attachment]

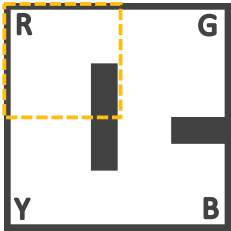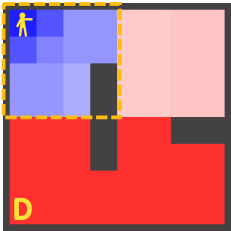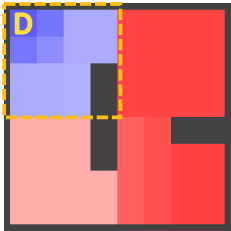

Supplement: supplementary_material [file attachment]

# Coarse Abstraction

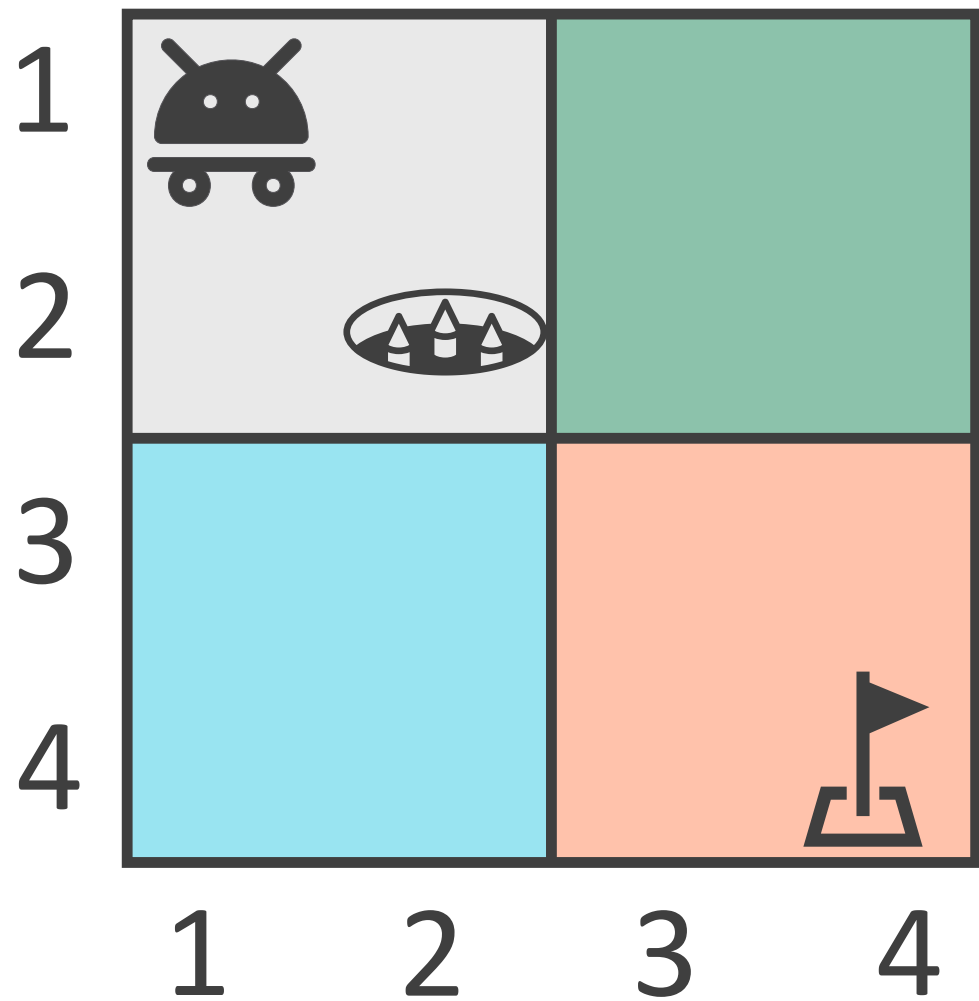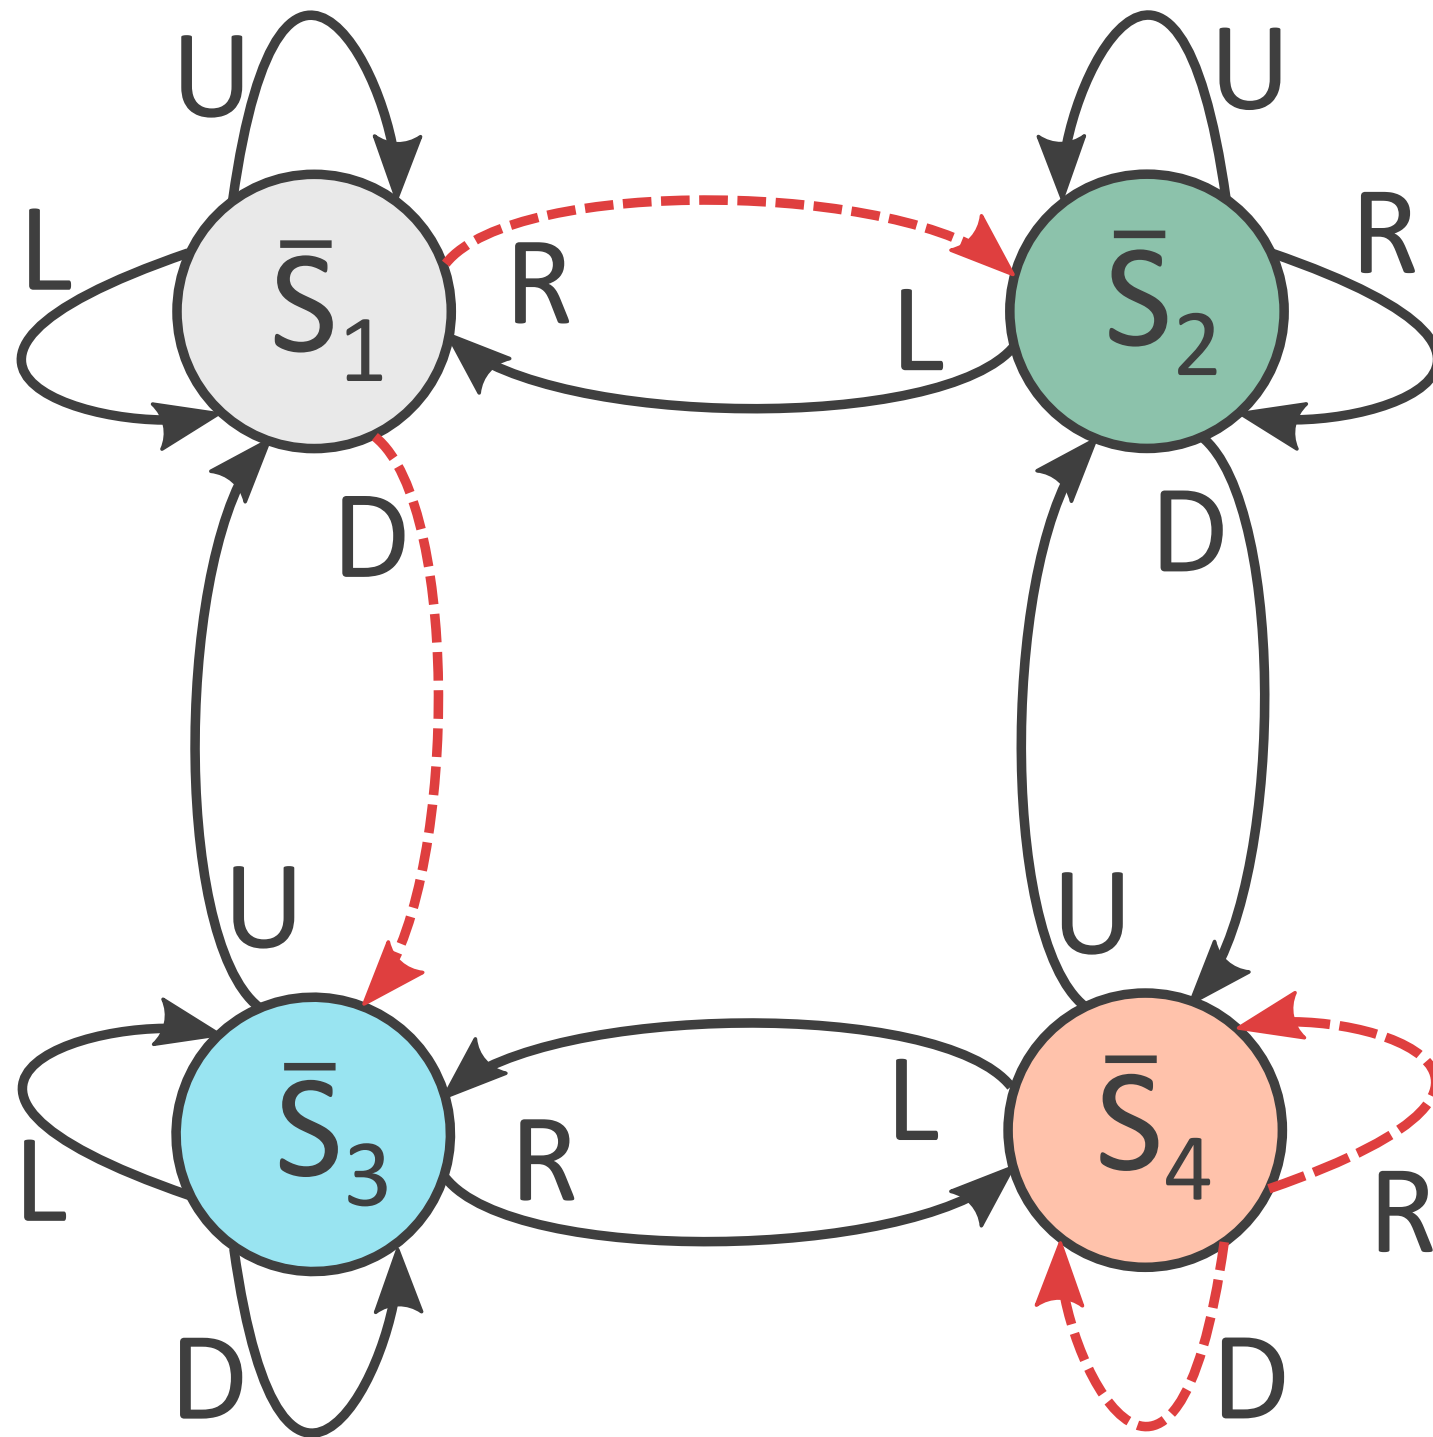

# Refined Abstraction

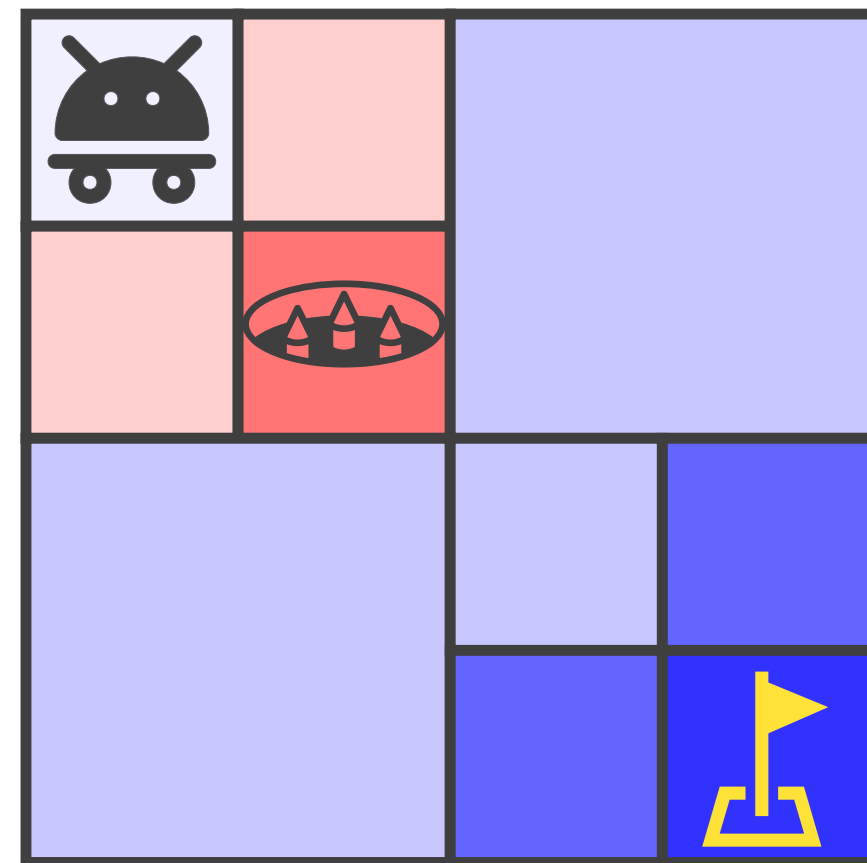

Supplement: supplementary_material [file attachment]
